# Supplementary material for: Analysis of barriers to thirst intervention in critically ill patients by ICU nurses: A qualitative study based on the Theoretical Domain Framework
Source: Research Square preprint supplement (doi:10.21203/rs.3.rs-7893573/v1), 2025-11-28
Supplement: Supplementary file 1 [file 8f36ed84c44c6eab3725bd64.docx]

**Appendix 1**

**Interview Guide**

**Study Title:** Analysis of barriers to thirst intervention in critically ill patients by ICU nurses: A qualitative study based on the Theoretical Domain Framework

Welcome from the moderator:

Thank you all for being here.Today we'd like to learn about your experiences and insights as ICU nurses regarding thirst management for critically ill patients. I will moderate and guide this discussion, while my colleague will take notes. We value every participant's perspective. If I haven't heard from you yet, I'll invite you to share your insights or add information at an appropriate time. This meeting will last no longer than one hour and will be recorded in its entirety.

| **Domain** | **Interview Outline** |
| --- | --- |
| **Knowledge** | What processes or guidelines do you know of regarding thirst management for critically ill patients? |
| **Skills** | If implementing thirst management for critically ill patients, what skills and training do you think are necessary? Do you currently possess these skills? |
| **Social/occupational identity and role identity** | What personnel do you think are needed to implement thirst management for critically ill patients? |
| **Belief in ability** | How confident are you in your ability to accurately assess the degree of thirst in critically ill patients? |
| **Belief in results** | What are the benefits and drawbacks of implementing thirst management? |
| **Motivation and goals** | To what extent would you like to follow guidelines for implementing thirst management in critically ill patients? What factors might hinder you from implementing it? |
| **Memory/attention and decision-making ability** | What challenges does implementing thirst management present in the complex ICU environment? |
| **Environment and resources** | What human and material resources do the department provide to support the implementation of thirst management? What improvements are needed in the environment and equipment? |
| **Social influence** | Which individuals or policies within the department may influence your implementation of thirst management for critically ill patients? |
| **Emotions** | How might implementing thirst management for critically ill patients affect your emotions, and why? |
| **Behavioural norms** | At the individual or departmental level, what factors may support or hinder the implementation of thirst management? |
| **Behavioural characteristics** | Would you alter your previous practices to implement thirst management? Would you develop a nursing plan based on the recommendations for thirst management outlined in the guidelines and expert consensus? |
